# Supplementary material
Source: Springer Nature journal article supplement (https://www.springermedizin.de/resource/supplementary/12913_2010_1717_MOESM4_ESM.pdf/9528822)

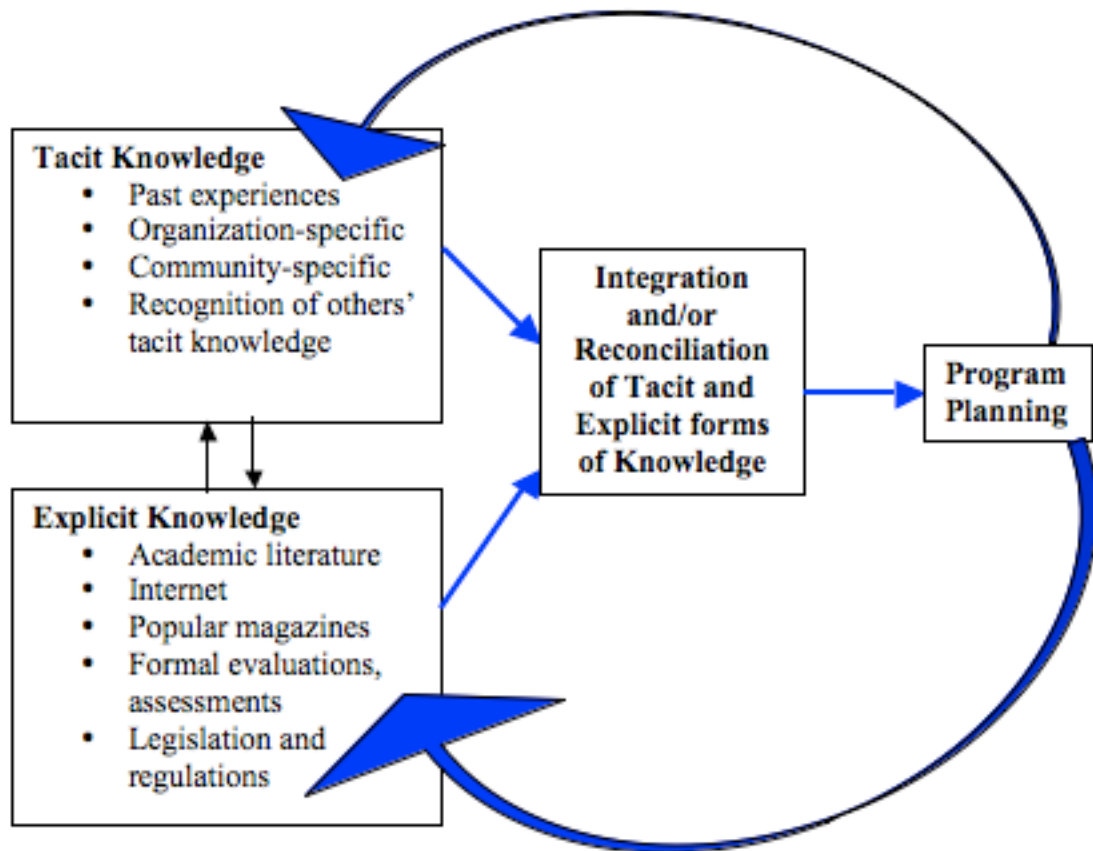

Supplement: MOESM4 [file 9528822]
